# Supplementary material for: Dermatophagoides farinae Extract Induces Interleukin 33-Mediated Atopic Skin Inflammation via Activation of RIP1
Source: MDPI journal article supplement (doi:10.3390/ijms24065228), 2023-03-09
Supplement: s1 [file s1]

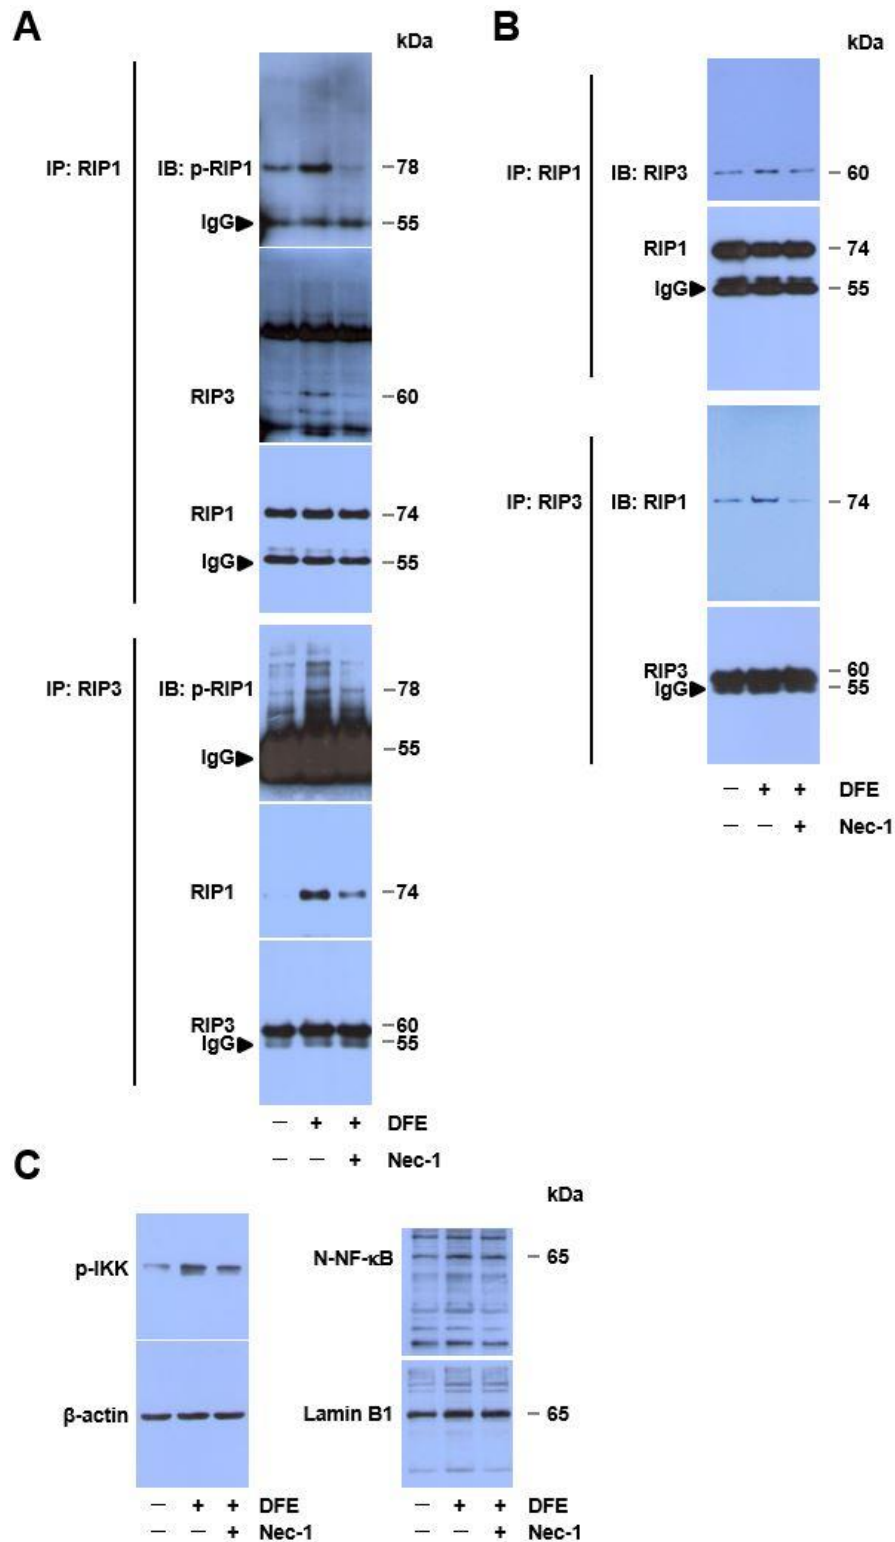

**Supplementary Figure S1.** (A and B) *HaCaT* cells or HKCs were stimulated with DFE (100  $\mu$ g/ml) for immunoprecipitation (IP) with anti-phospho-RIP1, anti-RIP1, or anti-RIP3 antibodies. Phospho-RIP1, RIP1, and RIP3 protein levels from whole-cell lysates were determined using immunoblotting. (C) HKCs were pretreated with Nec-1 (10  $\mu$ M) 1 h before stimulation with DFE (100  $\mu$ g/ml) for 1 h. The activation of IKK and NF- $\kappa$ B were analyzed with immunoblotting.  $\beta$ -actin or lamin B1 were used as loading controls. N-NF- $\kappa$ B: nucleus NF- $\kappa$ B

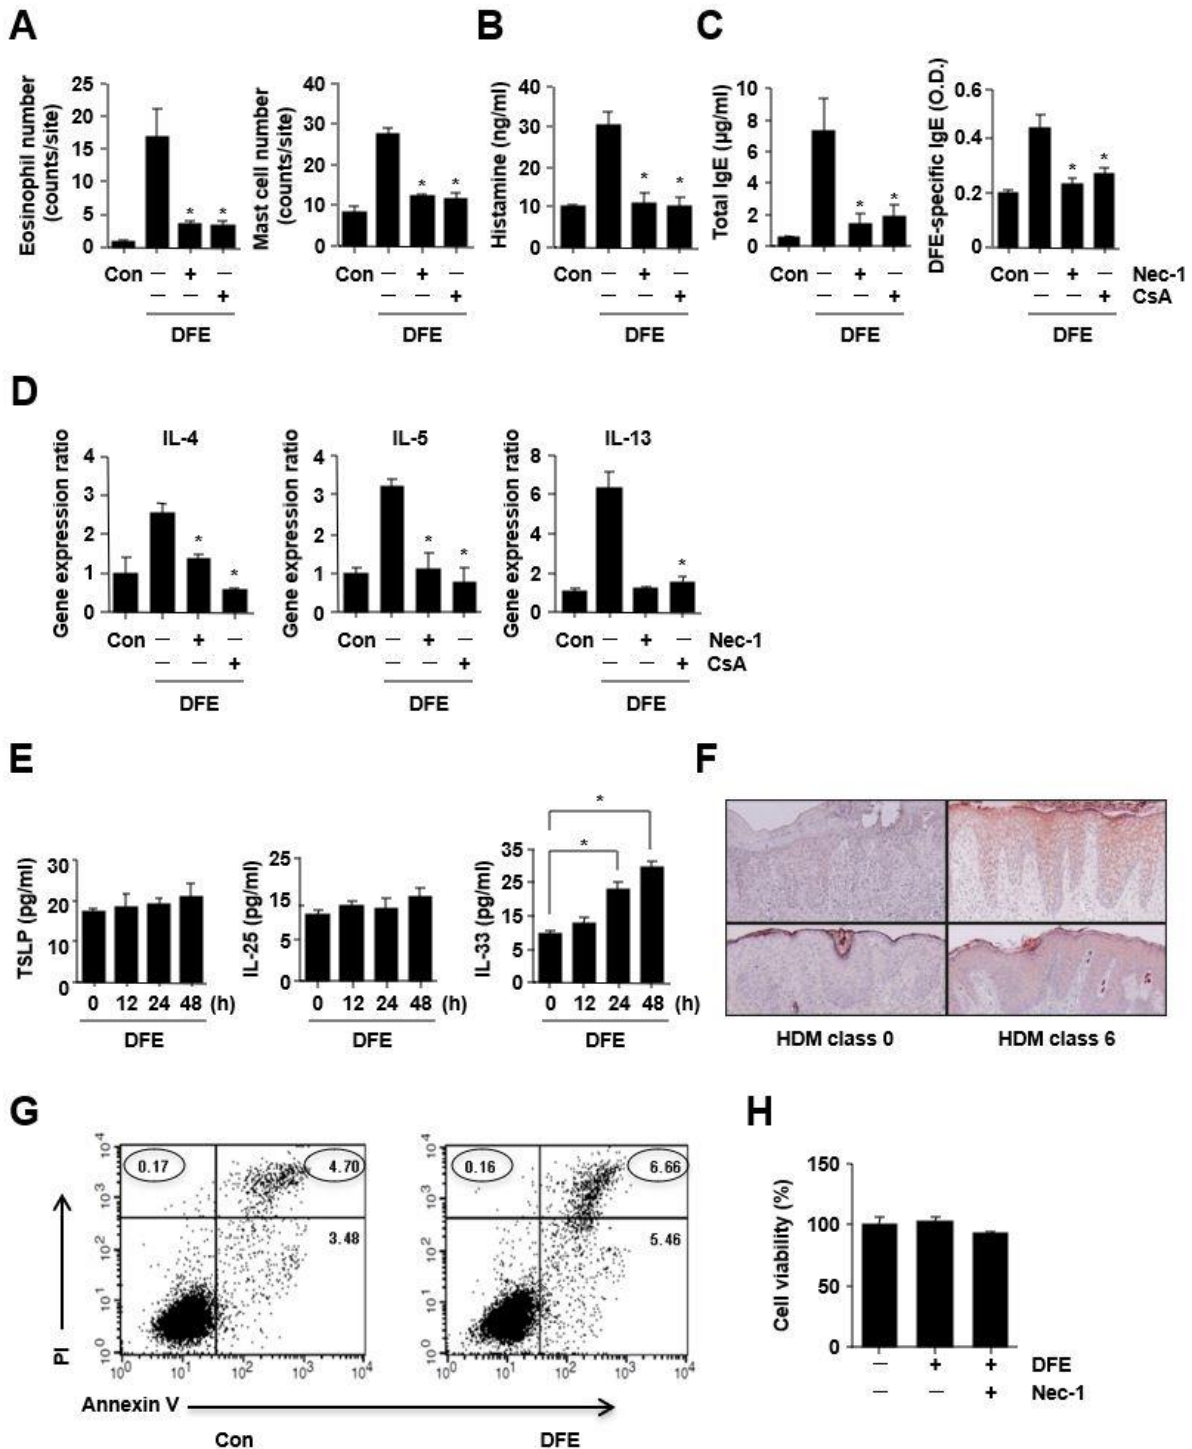

**Supplementary Figure S2.** (A) Eosinophils or mast cells were counted in 10 high-power fields at a magnification of  $\times 400$  in H&E or TE stained sections. (B) Histamine levels were detected using a fluorescent plate reader. (C) Serum levels of immunoglobulin in DFE-induced atopic skin inflammation. Total serum IgE levels and DFE-specific IgE levels were measured using ELISA. (D) Expression of Th2 pro-inflammatory cytokines in the ear of in the DFE-induced mouse model. Ears were excised, and total RNA was isolated. qPCR was performed as described in the Methods section. Samples of vehicle and DFE plus Nec-1 (5 mg/kg) or CsA (5 mg/kg) groups were collected on day 42. (E) *HaCaT* cells were stimulated with DFE (100  $\mu$ g/ml) for 12 h, 24 h, or 48 h and the expression of IL-25 and IL-33 were measured using ELISA. (F) Tissue expression of IL-33 was detected by immunohistochemical staining in the lesional skin of AD patients with high house dust mite (HDM) sensitization (HDM-specific IgE levels > 50 IU/ml, class 5 & 6) and patients with no HDM sensitization (HDM-specific IgE levels < 0.7 IU/ml, class 0 & 1). (G) Flow cytometry analysis of HKCs treated with DFE (100  $\mu$ g/ml) for 24 h. (h)

Cell viability of DFE and/or Nec-1 on HKCs. Cell viability was determined using the MTT assay. Data are presented as mean  $\pm$  SEM ( $n = 5$ ). \* $p < 0.05$ , significantly lower than the DFE group.

**Supplementary Table S1.** Clinical and laboratory characteristics of patients with AD for immunohistochemical analysis

|                                            | High HDM sensitization ( <i>n</i> = 6)       | Low HDM sensitization ( <i>n</i> = 5)        |
|--------------------------------------------|----------------------------------------------|----------------------------------------------|
| Sex                                        | Male ( <i>n</i> = 5), female ( <i>n</i> = 1) | Male ( <i>n</i> = 2), female ( <i>n</i> = 3) |
| Age*                                       | 19.8 ± 3.6                                   | 28.2 ± 14.3                                  |
| AD Severity* (by EASI†)                    | 25.9 ± 8.8                                   | 22.2 ± 8.2                                   |
| Combined allergic diseases                 | Allergic rhinitis & asthma ( <i>n</i> = 1)   | None                                         |
| Total IgE (kU/l)*                          | 3013.0 ± 1871.0                              | 816.8 ± 575.6                                |
| Total eosinophil count(/mm <sup>3</sup> )* | 532.0 ± 185.3                                | 197.5 ± 124.3                                |

AD, atopic dermatitis; HDM, house dust mite.

The HDM-specific IgE level was classified into seven quantitative classes by the following criteria: class 0, below 0.35 IU/ml; class 1, 0.35 to 0.69 IU/ml; class 2, 0.7 to 3.49 IU/ml; class 3, 3.5 to 17.49 IU/ml; class 4, 17.5 to 49.99 IU/ml; class 5, 50 to 99.99 IU/ml; and class 6, above 100 IU/ml. The patients were divided into two groups, the low sensitization group, composed of HDM-specific IgE classes 0&1, and the high sensitization group, composed of classes 5&6.

\*Mean ± SD

†EASI, Eczema Area and Severity Index

**Supplementary Table S2.** List of primers for the qPCR experiment

| Gene  |                                 | Forward primer (5'-3')     | Reverse primer (5'-3')      |
|-------|---------------------------------|----------------------------|-----------------------------|
| Mouse | <i>Il-4</i>                     | ACA GGA GAA GGG ACG CCA T  | GAA GCC GTA CAG ACG AGC TCA |
|       | <i>Il-5</i>                     | GAA GTG TGG CGA GGA GAG AC | GCA CAG TTT TGT GGG GTT TT  |
|       | <i>Il-13</i>                    | GCA ACA TCA ACA GGA CCA GA | GTC AGG GAA TCC AGG GCT AC  |
|       | <i><math>\beta</math>-actin</i> | TAG ACT TCG AGC AGG AGA TG | TTG ATC TTC ATG GTG CTA GG  |
